# Supplementary material for: Crystal structure prediction of CL-20 polymorphs using a tailor-made polarizable force field
Source: Royal Society of Chemistry journal article supplement (doi:10.1039/d3ce00256j), 2023-01-01
Supplement: d3ce00256j2.pdf [file d3ce00256j2.pdf]

## Supporting Information

### Crystal structure prediction of CL-20 polymorphs using a tailor-made polarizable force field

*Yiding Ma<sup>1,2</sup>, Yilin Cao<sup>1,2</sup>, Tao Yu<sup>1,2</sup>, Zhixiang Zhang<sup>1,2</sup>, Weipeng Lai<sup>1,2</sup>, Chao Chen<sup>1,2</sup>, Linyuan Wen<sup>1,2</sup>, Yingzhe Liu<sup>1,2</sup>\**

1 Xi'an Key Laboratory of Liquid Crystal and Organic Photovoltaic Materials, Xi'an Modern Chemistry Research Institute, Xi'an 710065, P. R. China

2 State Key Laboratory of Fluorine & Nitrogen Chemicals, Xi'an Modern Chemistry Research Institute, Xi'an 710065, P. R. China

\*Corresponding author. E-mail: liuyz\_204@163.com

1. Periodic DFT optimization and energy ranking of the low energy structures predicted by TMPFF.

Periodic DFT optimization of the low energy structures predicted by TMPFF was conducted using VASP program with the plane-wave basis and the projected augmented wave(PAW) method<sup>[1-2]</sup>, GGA-PBE functional<sup>[3]</sup> was used and DFT-D3 correlation was applied to improve van der Waals description<sup>[4]</sup>. The kinetic cutoff energy was chosen to be 500 eV and the Brillouin zone was sampled with a gamma-center k-mesh which was generated with KP-resolved values of  $2\pi \times 0.04 \text{ \AA}^{-1}$ . For all the computations, the convergence thresholds were set as  $10^{-6}$  eV in energy and 0.01 eV/  $\text{\AA}$  in force. No constrains of space groups are applied during optimization.

The energy ranking is shown in Figure S1, note that the energy of  $\beta$ -EA223 and  $\beta$ -EA153(conformation#3) converged after the optimization, and identified the same( $PS_{ab}=0.033$ ) using CrystalCMP program.

**Table S1.** Results of the periodic DFT optimizations of CL-20 experimental polymorphs and low energy structures predicted by TMPFF.

|                | ID                                 | $a(\text{\AA})$ | $b(\text{\AA})$ | $c(\text{\AA})$ | $\alpha(^{\circ})$ | $\beta(^{\circ})$ | $\gamma(^{\circ})$ | E(eV)    |
|----------------|------------------------------------|-----------------|-----------------|-----------------|--------------------|-------------------|--------------------|----------|
| Conformation#1 | $\beta$ -CL-20<br>(PUBMUU01)       | 9.611           | 11.491          | 13.091          | 90.00              | 90.00             | 90.00              | -950.204 |
|                | EA435                              | 9.596           | 11.506          | 13.100          | 90.00              | 90.00             | 90.00              | -950.203 |
|                | EA1155                             | 8.063           | 12.126          | 15.055          | 90.00              | 90.00             | 90.00              | -949.779 |
|                | EA1114                             | 10.970          | 11.647          | 11.863          | 90.00              | 90.00             | 90.00              | -949.998 |
| Conformation#2 | $\gamma$ -CL-20<br>(PUBMUU)        | 8.169           | 13.195          | 14.811          | 90.00              | 109.29            | 90.00              | -950.279 |
|                | EA2024                             | 8.000           | 13.345          | 14.900          | 90.00              | 109.48            | 90.00              | -950.228 |
|                | EA2103                             | 7.878           | 13.170          | 15.751          | 90.00              | 113.72            | 90.00              | -950.039 |
|                | EA2300                             | 8.881           | 12.546          | 13.782          | 90.00              | 106.64            | 90.00              | -949.714 |
| Conformation#3 | $\varepsilon$ -CL-20<br>(PUBMUU02) | 8.851           | 12.554          | 13.342          | 90.00              | 106.56            | 90.00              | -950.376 |
|                | EA1497                             | 8.884           | 12.499          | 13.341          | 90.00              | 106.61            | 90.00              | -950.366 |
|                | EA223                              | 8.835           | 12.513          | 13.080          | 90.00              | 90.00             | 90.00              | -950.276 |
|                | EA153                              | 8.823           | 12.497          | 13.111          | 90.00              | 90.00             | 90.00              | -950.275 |

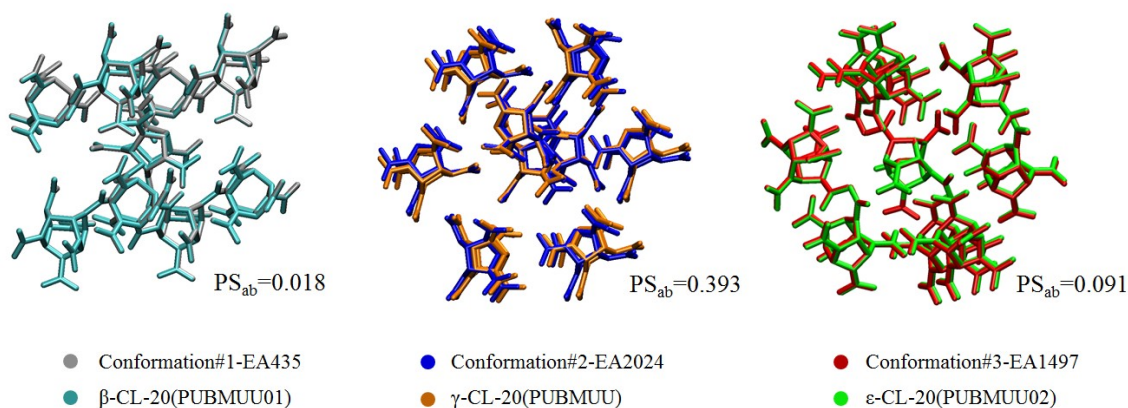

**Figure S1** The comparison of predicted structures and experimental polymorphs of CL-20 after periodic DFT optimizations.

2. Multipole parameters calculated under B3LYP/6-311G(d,p) and BHandHLYP/6-311G(d,p) level of basis.

Multipoles of the atoms are calculated with Distributed Multipole Analysis of Gaussian wavefunctions (GDMA) program developed by Stones *et. al*<sup>[5]</sup>, the Gaussian checkpoint file of QM optimization of  $\varepsilon$ -CL-20 molecule is input. Results are shown in Table S2.

**Table S2.** Multipole parameters of  $\epsilon$ -CL-20 calculated under B3LYP/6-311G(d,p) and BHandHLYP/6-311G(d,p) level of basis

| ID | B3LYP/6-311G(d,p) |          |          |          | BHandHLYP/6-311G(d,p) |          |          |          |
|----|-------------------|----------|----------|----------|-----------------------|----------|----------|----------|
| C1 | charge            | 0.21994  |          |          | charge                | 0.2121   |          |          |
|    | dipole            | 0.00548  | 0        | 0.32367  | dipole                | 0.00374  | 0        | 0.33638  |
|    |                   | 0.48258  |          |          |                       | 0.50555  |          |          |
|    | quadrupole        | 0        | -0.35752 |          | quadrupole            | 0        | -0.38159 |          |
|    |                   | 0.01844  | 0        | -0.12506 |                       | 0.01705  | 0        | -0.12396 |
| H1 | charge            | 0.17272  |          |          | charge                | 0.18224  |          |          |
|    | dipole            | 0.00129  | 0        | -0.12665 | dipole                | 0.00235  | 0        | -0.13089 |
|    |                   | -0.01526 |          |          |                       | -0.01548 |          |          |
|    | quadrupole        | 0        | -0.01547 |          | quadrupole            | 0        | -0.01572 |          |
|    |                   | 0.00296  | 0        | 0.03073  |                       | 0.00366  | 0        | 0.0312   |
| N1 | charge            | -0.30537 |          |          | charge                | -0.30876 |          |          |
|    | dipole            | 0.19929  | 0        | -0.00819 | dipole                | 0.21744  | 0        | -0.01692 |
|    |                   | 0.05687  |          |          |                       | 0.01172  |          |          |
|    | quadrupole        | 0        | -0.3995  |          | quadrupole            | 0        | -0.44082 |          |
|    |                   | -0.19672 | 0        | 0.34263  |                       | -0.24982 | 0        | 0.4291   |
| N2 | charge            | 1.05609  |          |          | charge                | 1.07685  |          |          |
|    | dipole            | -0.01834 | 0        | -0.06316 | dipole                | -0.02036 | 0        | -0.04478 |
|    |                   | 0.25175  |          |          |                       | 0.19612  |          |          |
|    | quadrupole        | 0        | -0.4823  |          | quadrupole            | 0        | -0.41151 |          |
|    |                   | 0.01807  | 0        | 0.23055  |                       | 0.01666  | 0        | 0.21539  |
| O1 | charge            | -0.53563 |          |          | charge                | -0.55038 |          |          |
|    | dipole            | 0.14908  | 0        | -0.13232 | dipole                | 0.13374  | 0        | -0.12972 |
|    |                   | -0.52588 |          |          |                       | -0.50812 |          |          |
|    | quadrupole        | 0        | 0.24966  |          | quadrupole            | 0        | 0.2035   |          |
|    |                   | 0.1314   | 0        | 0.27622  |                       | 0.11814  | 0        | 0.30462  |
| O2 | charge            | -0.53563 |          |          | charge                | -0.55038 |          |          |
|    | dipole            | 0.14908  | 0        | -0.13232 | dipole                | 0.13374  | 0        | -0.12972 |
|    |                   | -0.52588 |          |          |                       | -0.50812 |          |          |
|    | quadrupole        | 0        | 0.24966  |          | quadrupole            | 0        | 0.2035   |          |
|    |                   | 0.1314   | 0        | 0.27622  |                       | 0.11814  | 0        | 0.30462  |
| C2 | charge            | 0.08896  |          |          | charge                | 0.09651  |          |          |
|    | dipole            | 0.13635  | 0        | 0.31563  | dipole                | 0.13816  | 0        | 0.35826  |
|    |                   | 0.37608  |          |          |                       | 0.37933  |          |          |
|    | quadrupole        | 0        | -0.71246 |          | quadrupole            | 0        | -0.80139 |          |
|    |                   | 0.04081  | 0        | 0.33638  |                       | 0.04455  | 0        | 0.42206  |
| H2 | charge            | 0.16989  |          |          | charge                | 0.18084  |          |          |
|    | dipole            | 0.00021  | 0        | -0.12423 | dipole                | 0.00102  | 0        | -0.12982 |
|    |                   | -0.01628 |          |          |                       | -0.01573 |          |          |
|    | quadrupole        | 0        | -0.01484 |          | quadrupole            | 0        | -0.01476 |          |
|    |                   | 0.00122  | 0        | 0.03112  |                       | 0.00153  | 0        | 0.03049  |
| N3 | charge            | -0.2073  |          |          | charge                | -0.21614 |          |          |
|    | dipole            | 0.00018  | 0        | -0.26747 | dipole                | -0.00938 | 0        | -0.28186 |
|    |                   | 0.64169  |          |          |                       | 0.63746  |          |          |
|    | quadrupole        | 0        | -1.31795 |          | quadrupole            | 0        | -1.39558 |          |
|    |                   | -0.01378 | 0        | 0.67626  |                       | 0.0039   | 0        | 0.75812  |
| N4 | charge            | 1.14403  |          |          | charge                | 1.16788  |          |          |
|    | dipole            | 0.01407  | 0        | -0.09968 | dipole                | 0.01394  | 0        | -0.08352 |
|    |                   | 0.32268  |          |          |                       | 0.25859  |          |          |
|    | quadrupole        | 0        | -0.47522 |          | quadrupole            | 0        | -0.39969 |          |
|    |                   | -0.00615 | 0        | 0.15254  |                       | -0.00559 | 0        | 0.1411   |
| O3 | charge            | -0.58349 |          |          | charge                | -0.59795 |          |          |
|    | dipole            | 0.16947  | 0        | -0.16235 | dipole                | 0.15248  | 0        | -0.1608  |
|    |                   | -0.48364 |          |          |                       | -0.4632  |          |          |
|    | quadrupole        | 0        | 0.24811  |          | quadrupole            | 0        | 0.20151  |          |
|    |                   | 0.16086  | 0        | 0.23553  |                       | 0.14678  | 0        | 0.26169  |

|    |            |          |          |          |            |          |          |          |
|----|------------|----------|----------|----------|------------|----------|----------|----------|
| O4 | charge     | -0.58349 |          |          | charge     | -0.59795 |          |          |
|    | dipole     | 0.16947  | 0        | -0.16235 | dipole     | 0.15248  | 0        | -0.1608  |
|    |            | -0.48364 |          |          |            | -0.4632  |          |          |
|    | quadrupole | 0        | 0.24811  |          | quadrupole | 0        | 0.20151  |          |
|    |            | 0.16086  | 0        | 0.23553  |            | 0.14678  | 0        | 0.26169  |
| C3 | charge     | 0.05858  |          |          | charge     | 0.06641  |          |          |
|    | dipole     | -0.00449 | 0        | 0.23281  | dipole     | -0.00368 | 0        | 0.25493  |
|    |            | 0.64368  |          |          |            | 0.62741  |          |          |
|    | quadrupole | 0        | -0.66398 |          | quadrupole | 0        | -0.71165 |          |
|    |            | -0.05541 | 0        | 0.0203   |            | -0.05002 | 0        | 0.08424  |
| H3 | charge     | 0.172    |          |          | charge     | 0.17534  |          |          |
|    | dipole     | 0.00915  | 0        | -0.11591 | dipole     | 0.01068  | 0        | -0.12539 |
|    |            | -0.01858 |          |          |            | -0.01606 |          |          |
|    | quadrupole | 0        | -0.01595 |          | quadrupole | 0        | -0.01438 |          |
|    |            | 0.01255  | 0        | 0.03453  |            | 0.01301  | 0        | 0.03044  |
| N5 | charge     | -0.26105 |          |          | charge     | -0.27811 |          |          |
|    | dipole     | 0.05263  | 0        | -0.11256 | dipole     | 0.04008  | 0        | -0.10497 |
|    |            | 0.1783   |          |          |            | 0.18124  |          |          |
|    | quadrupole | 0        | -0.81174 |          | quadrupole | 0        | -0.89258 |          |
|    |            | -0.10656 | 0        | 0.63344  |            | -0.10914 | 0        | 0.71134  |
| N6 | charge     | 1.10753  |          |          | charge     | 1.12935  |          |          |
|    | dipole     | -0.0011  | 0        | -0.12777 | dipole     | 0.00186  | 0        | -0.11304 |
|    |            | 0.24631  |          |          |            | 0.17665  |          |          |
|    | quadrupole | 0        | -0.48563 |          | quadrupole | 0        | -0.40166 |          |
|    |            | -0.01106 | 0        | 0.23932  |            | -0.01542 | 0        | 0.22501  |
| O5 | charge     | -0.57991 |          |          | charge     | -0.59337 |          |          |
|    | dipole     | 0.1768   | 0        | -0.16137 | dipole     | 0.16363  | 0        | -0.15882 |
|    |            | -0.53804 |          |          |            | -0.52564 |          |          |
|    | quadrupole | 0        | 0.27     |          | quadrupole | 0        | 0.22738  |          |
|    |            | 0.16973  | 0        | 0.26804  |            | 0.15695  | 0        | 0.29826  |
| O6 | charge     | -0.57991 |          |          | charge     | -0.59337 |          |          |
|    | dipole     | 0.1768   | 0        | -0.16137 | dipole     | 0.16363  | 0        | -0.15882 |
|    |            | -0.53804 |          |          |            | -0.52564 |          |          |
|    | quadrupole | 0        | 0.27     |          | quadrupole | 0        | 0.22738  |          |
|    |            | 0.16973  | 0        | 0.26804  |            | 0.15695  | 0        | 0.29826  |
| C4 | charge     | 0.1916   |          |          | charge     | 0.20816  |          |          |
|    | dipole     | 0.00983  | 0        | 0.24885  | dipole     | 0.00591  | 0        | 0.26287  |
|    |            | 0.38595  |          |          |            | 0.39949  |          |          |
|    | quadrupole | 0        | -0.23155 |          | quadrupole | 0        | -0.29165 |          |
|    |            | 0.0012   | 0        | -0.1544  |            | -0.00234 | 0        | -0.10784 |
| H4 | charge     | 0.16784  |          |          | charge     | 0.1719   |          |          |
|    | dipole     | 0.00249  | 0        | -0.11353 | dipole     | 0.00244  | 0        | -0.12045 |
|    |            | -0.01736 |          |          |            | -0.01657 |          |          |
|    | quadrupole | 0        | -0.01745 |          | quadrupole | 0        | -0.01673 |          |
|    |            | 0.00319  | 0        | 0.03481  |            | 0.00296  | 0        | 0.0333   |
| N7 | charge     | -0.31978 |          |          | charge     | -0.33239 |          |          |
|    | dipole     | 0.11634  | 0        | -0.03004 | dipole     | 0.11766  | 0        | -0.02639 |
|    |            | 0.21392  |          |          |            | 0.23545  |          |          |
|    | quadrupole | 0        | -0.84026 |          | quadrupole | 0        | -0.9269  |          |
|    |            | -0.1694  | 0        | 0.62634  |            | -0.17854 | 0        | 0.69145  |
| N8 | charge     | 1.09489  |          |          | charge     | 1.11717  |          |          |
|    | dipole     | -0.00035 | 0        | -0.10917 | dipole     | 0.00248  | 0        | -0.096   |
|    |            | 0.22405  |          |          |            | 0.15251  |          |          |
|    | quadrupole | 0        | -0.45192 |          | quadrupole | 0        | -0.3657  |          |
|    |            | -0.01018 | 0        | 0.22787  |            | -0.01503 | 0        | 0.21319  |
| O7 | charge     | -0.5766  |          |          | charge     | -0.58971 |          |          |
|    | dipole     | 0.17075  | 0        | -0.15153 | dipole     | 0.15738  | 0        | -0.14906 |
|    |            | -0.52777 |          |          |            | -0.51577 |          |          |
|    | quadrupole | 0        | 0.24991  |          | quadrupole | 0        | 0.20694  |          |
|    |            | 0.16088  | 0        | 0.27786  |            | 0.15055  | 0        | 0.30883  |

|     |            |          |          |          |            |          |          |          |
|-----|------------|----------|----------|----------|------------|----------|----------|----------|
| O8  | charge     | -0.5766  |          |          | charge     | -0.58971 |          |          |
|     | dipole     | 0.17075  | 0        | -0.15153 | dipole     | 0.15738  | 0        | -0.14906 |
|     | quadrupole | -0.52777 |          |          | quadrupole | -0.51577 |          |          |
| C5  | charge     | 0.18232  |          |          | charge     | 0.19031  |          |          |
|     | dipole     | 0.02224  | 0        | 0.24849  | dipole     | 0.03035  | 0        | 0.26334  |
|     | quadrupole | 0.70524  |          |          | quadrupole | 0.70609  |          |          |
| H5  | charge     | 0        | -0.60163 |          | charge     | 0        | -0.64421 |          |
|     | dipole     | -0.00289 | 0        | -0.10361 | dipole     | -0.00174 | 0        | -0.06188 |
|     | quadrupole | 0.002    | 0        | 0.02646  | quadrupole | 0.00175  | 0        | 0.0231   |
| N9  | charge     | 0.15981  |          |          | charge     | 0.16323  |          |          |
|     | dipole     | 0.00429  | 0        | -0.1246  | dipole     | 0.00364  | 0        | -0.13379 |
|     | quadrupole | -0.01089 |          |          | quadrupole | -0.00948 |          |          |
| N10 | charge     | 0        | -0.01557 |          | charge     | 0        | -0.01362 |          |
|     | dipole     | 0.002    | 0        | 0.02646  | dipole     | 0.00175  | 0        | 0.0231   |
|     | quadrupole | 0.002    | 0        | 0.02646  | quadrupole | 0.00175  | 0        | 0.0231   |
| O9  | charge     | -0.24043 |          |          | charge     | -0.24184 |          |          |
|     | dipole     | 0.01565  | 0        | -0.17724 | dipole     | 0.01785  | 0        | -0.20848 |
|     | quadrupole | 0.41283  |          |          | quadrupole | 0.38603  |          |          |
| N10 | charge     | 0        | -1.11056 |          | charge     | 0        | -1.2315  |          |
|     | dipole     | 0.04231  | 0        | 0.69773  | dipole     | 0.03644  | 0        | 0.84547  |
|     | quadrupole | 0.04231  | 0        | 0.69773  | quadrupole | 0.03644  | 0        | 0.84547  |
| O9  | charge     | 1.08741  |          |          | charge     | 1.11023  |          |          |
|     | dipole     | -0.026   | 0        | -0.08274 | dipole     | -0.02503 | 0        | -0.06493 |
|     | quadrupole | 0.2728   |          |          | quadrupole | 0.21188  |          |          |
| O9  | charge     | 0        | -0.46989 |          | charge     | 0        | -0.39935 |          |
|     | dipole     | 0.03902  | 0        | 0.19709  | dipole     | 0.03399  | 0        | 0.18747  |
|     | quadrupole | 0.03902  | 0        | 0.19709  | quadrupole | 0.03399  | 0        | 0.18747  |
| O9  | charge     | -0.54602 |          |          | charge     | -0.56178 |          |          |
|     | dipole     | 0.15365  | 0        | -0.13747 | dipole     | 0.1381   | 0        | -0.13651 |
|     | quadrupole | -0.50734 |          |          | quadrupole | -0.48906 |          |          |
| O10 | charge     | 0        | 0.25059  |          | charge     | 0        | 0.20576  |          |
|     | dipole     | 0.14582  | 0        | 0.25675  | dipole     | 0.13157  | 0        | 0.2833   |
|     | quadrupole | 0.14582  | 0        | 0.25675  | quadrupole | 0.13157  | 0        | 0.2833   |
| O10 | charge     | -0.54602 |          |          | charge     | -0.56178 |          |          |
|     | dipole     | 0.15365  | 0        | -0.13747 | dipole     | 0.1381   | 0        | -0.13651 |
|     | quadrupole | -0.50734 |          |          | quadrupole | -0.48906 |          |          |
| C6  | charge     | 0        | 0.25059  |          | charge     | 0        | 0.20576  |          |
|     | dipole     | 0.14582  | 0        | 0.25675  | dipole     | 0.13157  | 0        | 0.2833   |
|     | quadrupole | 0.14582  | 0        | 0.25675  | quadrupole | 0.13157  | 0        | 0.2833   |
| C6  | charge     | 0.08299  |          |          | charge     | 0.09082  |          |          |
|     | dipole     | -0.10063 | 0        | 0.35841  | dipole     | -0.10093 | 0        | 0.38763  |
|     | quadrupole | 0.45046  |          |          | quadrupole | 0.46666  |          |          |
| H6  | charge     | 0        | -0.72292 |          | charge     | 0        | -0.80307 |          |
|     | dipole     | 0.01505  | 0        | 0.27246  | dipole     | 0.00626  | 0        | 0.33641  |
|     | quadrupole | 0.01505  | 0        | 0.27246  | quadrupole | 0.00626  | 0        | 0.33641  |
| H6  | charge     | 0.16582  |          |          | charge     | 0.1743   |          |          |
|     | dipole     | 0.00713  | 0        | -0.12504 | dipole     | 0.00707  | 0        | -0.13036 |
|     | quadrupole | -0.01457 |          |          | quadrupole | -0.01433 |          |          |
| N11 | charge     | 0        | -0.01581 |          | charge     | 0        | -0.01561 |          |
|     | dipole     | 0.00714  | 0        | 0.03038  | dipole     | 0.0067   | 0        | 0.02994  |
|     | quadrupole | 0.00714  | 0        | 0.03038  | quadrupole | 0.0067   | 0        | 0.02994  |
| N11 | charge     | -0.3324  |          |          | charge     | -0.32849 |          |          |
|     | dipole     | 0.17909  | 0        | 0.01683  | dipole     | 0.19113  | 0        | -0.00213 |
|     | quadrupole | 0.07142  |          |          | quadrupole | 0.02798  |          |          |
| N12 | charge     | 0        | -0.37455 |          | charge     | 0        | -0.42827 |          |
|     | dipole     | -0.22765 | 0        | 0.30313  | dipole     | -0.2714  | 0        | 0.40029  |
|     | quadrupole | -0.22765 | 0        | 0.30313  | quadrupole | -0.2714  | 0        | 0.40029  |
| O11 | charge     | 1.06709  |          |          | charge     | 1.08743  |          |          |
|     | dipole     | -0.00165 | 0        | -0.07722 | dipole     | -0.00199 | 0        | -0.05813 |
|     | quadrupole | 0.25589  |          |          | quadrupole | 0.19624  |          |          |
| O11 | charge     | 0        | -0.48419 |          | charge     | 0        | -0.41241 |          |
|     | dipole     | -0.01409 | 0        | 0.2283   | dipole     | -0.01406 | 0        | 0.21617  |
|     | quadrupole | -0.01409 | 0        | 0.2283   | quadrupole | -0.01406 | 0        | 0.21617  |
| O11 | charge     | -0.53994 |          |          | charge     | -0.55448 |          |          |
|     | dipole     | 0.14728  | 0        | -0.13817 | dipole     | 0.13154  | 0        | -0.13578 |
|     | quadrupole | -0.50557 |          |          | quadrupole | -0.48736 |          |          |
| O11 | charge     | 0        | 0.2401   |          | charge     | 0        | 0.19398  |          |
|     | dipole     | 0.14135  | 0        | 0.26547  | dipole     | 0.12716  | 0        | 0.29338  |
|     | quadrupole | 0.14135  | 0        | 0.26547  | quadrupole | 0.12716  | 0        | 0.29338  |

|     |            |          |        |          |            |          |         |          |
|-----|------------|----------|--------|----------|------------|----------|---------|----------|
| O12 | charge     | -0.53994 |        |          | charge     | -0.55448 |         |          |
|     | dipole     | 0.14728  | 0      | -0.13817 | dipole     | 0.13154  | 0       | -0.13578 |
|     |            | -0.50557 |        |          |            | -0.48736 |         |          |
|     | quadrupole | 0        | 0.2401 |          | quadrupole | 0        | 0.19398 |          |
|     |            | 0.14135  | 0      | 0.26547  |            | 0.12716  | 0       | 0.29338  |

**Table S3.** Atom-by-atom comparison of polarizability parameters of  $\epsilon$ -CL-20 molecule fitted by AMOEBA and TMPFF.

| atom index | $\alpha_{\text{AMOEBA}}$<br>( $\text{\AA}^3$ ) | $\alpha_{\text{TMPFF}}$<br>( $\text{\AA}^3$ ) | atom index | $\alpha_{\text{AMOEBA}}$<br>( $\text{\AA}^3$ ) | $\alpha_{\text{TMPFF}}$<br>( $\text{\AA}^3$ ) |
|------------|------------------------------------------------|-----------------------------------------------|------------|------------------------------------------------|-----------------------------------------------|
| 1-C        | 1.334                                          | 1.59                                          | 19-C       | 1.334                                          | 1.07                                          |
| 2-H        | 0.496                                          | 0.45                                          | 20-H       | 0.496                                          | 0.27                                          |
| 3-N        | 1.073                                          | 1.52                                          | 21-N       | 1.073                                          | 1.67                                          |
| 4-N        | 1.073                                          | 0.90                                          | 22-N       | 1.073                                          | 1.13                                          |
| 5-O        | 0.837                                          | 0.57                                          | 23-O       | 0.837                                          | 0.72                                          |
| 6-O        | 0.837                                          | 0.75                                          | 24-O       | 0.837                                          | 0.76                                          |
| 7-C        | 1.334                                          | 2.37                                          | 25-C       | 1.334                                          | 1.77                                          |
| 8-H        | 0.496                                          | 1.14                                          | 26-H       | 0.496                                          | 0.70                                          |
| 9-N        | 1.073                                          | 1.64                                          | 27-N       | 1.073                                          | 1.82                                          |
| 10-N       | 1.073                                          | 0.84                                          | 28-N       | 1.073                                          | 0.82                                          |
| 11-O       | 0.837                                          | 0.83                                          | 29-O       | 0.837                                          | 0.74                                          |
| 12-O       | 0.837                                          | 0.61                                          | 30-O       | 0.837                                          | 1.01                                          |
| 13-C       | 1.334                                          | 0.93                                          | 31-C       | 1.334                                          | 0.69                                          |
| 14-H       | 0.496                                          | 0.32                                          | 32-H       | 0.496                                          | 0.20                                          |
| 15-N       | 1.073                                          | 1.64                                          | 33-N       | 1.073                                          | 1.15                                          |
| 16-N       | 1.073                                          | 1.16                                          | 34-N       | 1.073                                          | 0.81                                          |
| 17-O       | 0.837                                          | 0.74                                          | 35-O       | 0.837                                          | 0.74                                          |
| 18-O       | 0.837                                          | 0.75                                          | 36-O       | 0.837                                          | 0.88                                          |

As shown in Table S3, the polarizabilities of C, H, N, and O atoms in AMOEBA are uniformly set as 1.334, 0.496, 1.073, and 0.837, respectively. On the other hand, the polarizability estimated by the QTAIM method differs, reflecting the different chemical environments of each atom. For example, 3-N is located in the bone structure of the cage of  $\epsilon$ -CL-20, and 4-N is located in the  $-\text{NO}_2$  group, the lone pair electrons on the  $\text{sp}^3$  hybridized 3-N atom can be easier affected by an external electric field than the delocalized electrons on the  $\text{sp}^2$  hybridized 4-N atom, thus the polarizabilities are 1.52 and 0.90, respectively. The AMOEBA parameters overestimate the polarizabilities of C, H, and O atoms, and underestimate the polarizability of N atoms. Same results for the  $\beta$ - and  $\gamma$ -CL-20.

**Table S4.** Polarizability parameters calculated with and without D3 of  $\epsilon$ -CL-20

| ID | No D3<br>correction | With D3<br>correction | ID | No D3<br>correction | With D3<br>correction | ID  | No D3<br>correction | With D3<br>correction |
|----|---------------------|-----------------------|----|---------------------|-----------------------|-----|---------------------|-----------------------|
| C1 | 1.59                | 1.59                  | C3 | 0.93                | 0.93                  | C5  | 1.77                | 1.77                  |
| H1 | 0.45                | 0.45                  | H3 | 0.32                | 0.32                  | H5  | 0.7                 | 0.7                   |
| N1 | 1.52                | 1.52                  | N5 | 1.64                | 1.64                  | N9  | 1.82                | 1.82                  |
| N2 | 0.9                 | 0.9                   | N6 | 1.16                | 1.16                  | N10 | 0.82                | 0.82                  |
| O1 | 0.57                | 0.57                  | O5 | 0.74                | 0.74                  | O9  | 0.74                | 0.74                  |
| O2 | 0.75                | 0.75                  | O6 | 0.75                | 0.75                  | O10 | 1.01                | 1.01                  |
| C2 | 2.37                | 2.37                  | C4 | 1.07                | 1.07                  | C6  | 0.69                | 0.69                  |
| H2 | 1.14                | 1.14                  | H4 | 0.27                | 0.27                  | H6  | 0.2                 | 0.2                   |
| N3 | 1.64                | 1.64                  | N7 | 1.67                | 1.67                  | N11 | 1.15                | 1.15                  |
| N4 | 0.84                | 0.84                  | N8 | 1.13                | 1.13                  | N12 | 0.81                | 0.81                  |
| O3 | 0.83                | 0.83                  | O7 | 0.72                | 0.72                  | O11 | 0.74                | 0.74                  |
| O4 | 0.61                | 0.61                  | O8 | 0.76                | 0.76                  | O12 | 0.88                | 0.88                  |

**Table S5.** Parameters of top 3 predicted crystal structures of conforamtion#1 with lowest energies, in comparison with  $\beta$ -CL-20 (PUBMUU01) in CCDC database.

| ID       | Space group                                   | $\rho$ (g/cm <sup>3</sup> ) | Energy (kcal/mol) | $a$ (Å) | $b$ (Å) | $c$ (Å) | $\alpha$ (°) | $\beta$ (°) | $\gamma$ (°) |
|----------|-----------------------------------------------|-----------------------------|-------------------|---------|---------|---------|--------------|-------------|--------------|
| EA435    | Pca2 <sub>1</sub>                             | 1.980                       | -224.765          | 9.598   | 11.768  | 13.014  | 90.00        | 90.00       | 90.00        |
| EA1155   | P2 <sub>1</sub> 2 <sub>1</sub> 2 <sub>1</sub> | 2.012                       | -224.688          | 7.893   | 12.269  | 14.762  | 90.00        | 90.00       | 90.00        |
| EA1114   | Pca2 <sub>1</sub>                             | 1.918                       | -224.568          | 11.153  | 11.534  | 11.793  | 90.00        | 90.00       | 90.00        |
| PUBMUU01 | Pca2 <sub>1</sub>                             | 1.985                       | /                 | 9.676   | 11.649  | 13.006  | 90.00        | 90.00       | 90.00        |

**Table S6.** Parameters of top 3 predicted crystal structures of conforamtion#2 with lowest energies, in comparison with  $\gamma$ -CL-20 (PUBMUU) in CCDC database.

| ID     | Space group        | $\rho$ (g/cm <sup>3</sup> ) | Energy (kcal/mol) | $a$ (Å) | $b$ (Å) | $c$ (Å) | $\alpha$ (°) | $\beta$ (°) | $\gamma$ (°) |
|--------|--------------------|-----------------------------|-------------------|---------|---------|---------|--------------|-------------|--------------|
| EA2024 | P2 <sub>1</sub> /c | 1.910                       | -226.441          | 13.851  | 7.714   | 15.301  | 90.00        | 111.25      | 90.00        |
| EA2103 | P2 <sub>1</sub>    | 1.922                       | -226.357          | 13.129  | 7.747   | 15.973  | 90.00        | 111.23      | 90.00        |
| EA2300 | P2 <sub>1</sub> /c | 1.953                       | -226.053          | 12.487  | 8.896   | 14.113  | 90.00        | 108.11      | 90.00        |
| PUBMUU | P2 <sub>1</sub> /c | 1.916                       | /                 | 13.231  | 8.170   | 14.876  | 90.00        | 109.17      | 90.00        |

**Table S7.** Parameters of top 3 predicted crystal structures of conforamtion#3 with lowest energies, in comparison with  $\varepsilon$ -CL-20 (PUBMUU02) in CCDC database.

| ID       | Space group                                   | $\rho$ (g/cm <sup>3</sup> ) | Energy (kcal/mol) | $a$ (Å) | $b$ (Å) | $c$ (Å) | $\alpha$ (°) | $\beta$ (°) | $\gamma$ (°) |
|----------|-----------------------------------------------|-----------------------------|-------------------|---------|---------|---------|--------------|-------------|--------------|
| EA1497   | P2 <sub>1</sub> /c                            | 2.021                       | -228.381          | 9.007   | 12.329  | 13.604  | 90.00        | 107.61      | 90.00        |
| EA223    | P2 <sub>1</sub> 2 <sub>1</sub> 2 <sub>1</sub> | 1.989                       | -227.370          | 9.108   | 12.227  | 13.134  | 90.00        | 90.00       | 90.00        |
| EA153    | P2 <sub>1</sub> 2 <sub>1</sub> 2 <sub>1</sub> | 1.986                       | -226.994          | 9.107   | 12.215  | 13.171  | 90.00        | 90.00       | 90.00        |
| PUBMUU02 | P2 <sub>1</sub> /c                            | 2.044                       | /                 | 8.852   | 12.556  | 13.386  | 90.00        | 106.82      | 90.00        |

1. Kresse, G.; Hafner, J., Ab Initio Molecular Dynamics for Liquid Metals. *Physical Review B* 1993, 47, 558-561.
2. Kresse, G.; Furthmüller, J., Efficiency of Ab-Initio Total Energy Calculations for Metals and Semiconductors Using a Plane-Wave Basis Set. *Computational Materials Science* 1996, 6, 15-50.
3. Perdew, J. P.; Burke, K.; Ernzerhof, M., Generalized Gradient Approximation Made Simple. *Phys. Rev. Lett.* 1996, 77, 3865-3868.
4. Grimme, S.; Antony, J.; Ehrlich, S.; Krieg, H., A Consistent and Accurate Ab Initio Parametrization of Density Functional Dispersion Correction (Dft-D) for the 94 Elements H-Pu. *The Journal of Chemical Physics* 2010, 132, 154104.
5. Stone, A. J. and Alderton, M. Distributed multipole analysis: methods and applications. *Molecular Physics* 1985, 56, 1047-1064.
